# Supplementary material for: Ordered mesoporous MnO2 as a synergetic adsorbent for effective arsenic(iii) removal
Source: Royal Society of Chemistry journal article supplement (doi:10.1039/c3ta13790b), 2013-11-20
Supplement: c3ta13790b.pdf [file c3ta13790b.pdf]

**Electronic Supplementary Information (ESI) for**

**Ordered mesoporous MnO<sub>2</sub> nanoarrays as synergetic  
adsorbent for effective arsenic(III) removal**

**Bo Zhi, Hong Ding, Dongmei Wang, Yu Cao, Ye Zhang, Xue Wang, Yunling Liu and  
Qisheng Huo\***

*State Key Laboratory of Inorganic Synthesis and Preparative Chemistry, College of Chemistry, Jilin  
University, Changchun 130012, People's Republic of China.  
E-mail: huoqisheng@jlu.edu.cn; Fax: +86-431-85168624; Tel: +86-431-85168602*

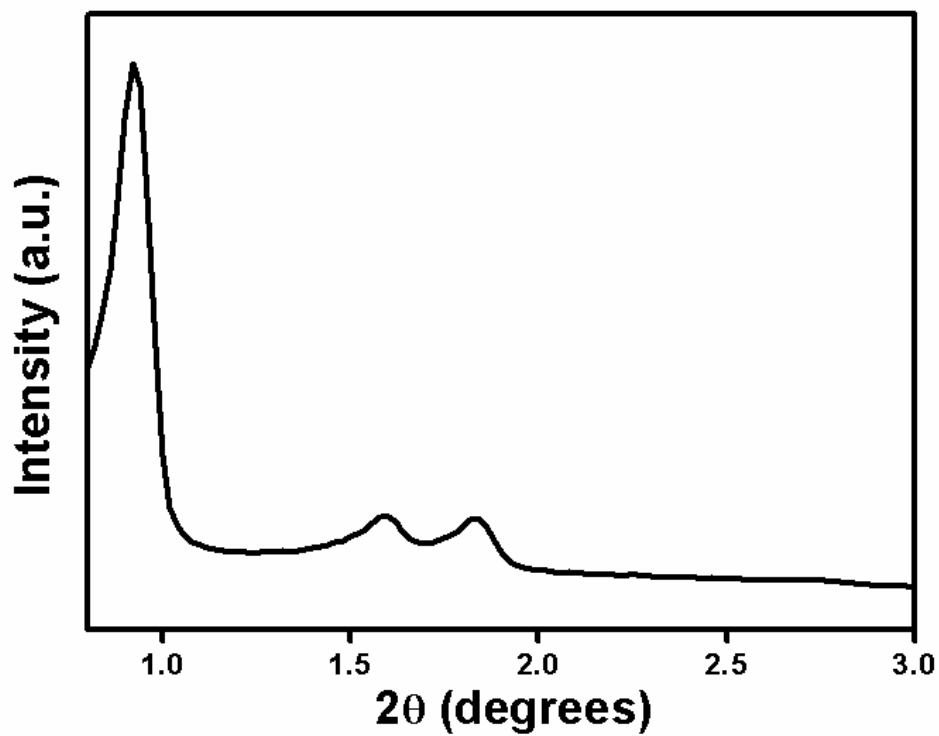

Fig. S1 The SAXRD pattern of SBA-15 silica template.

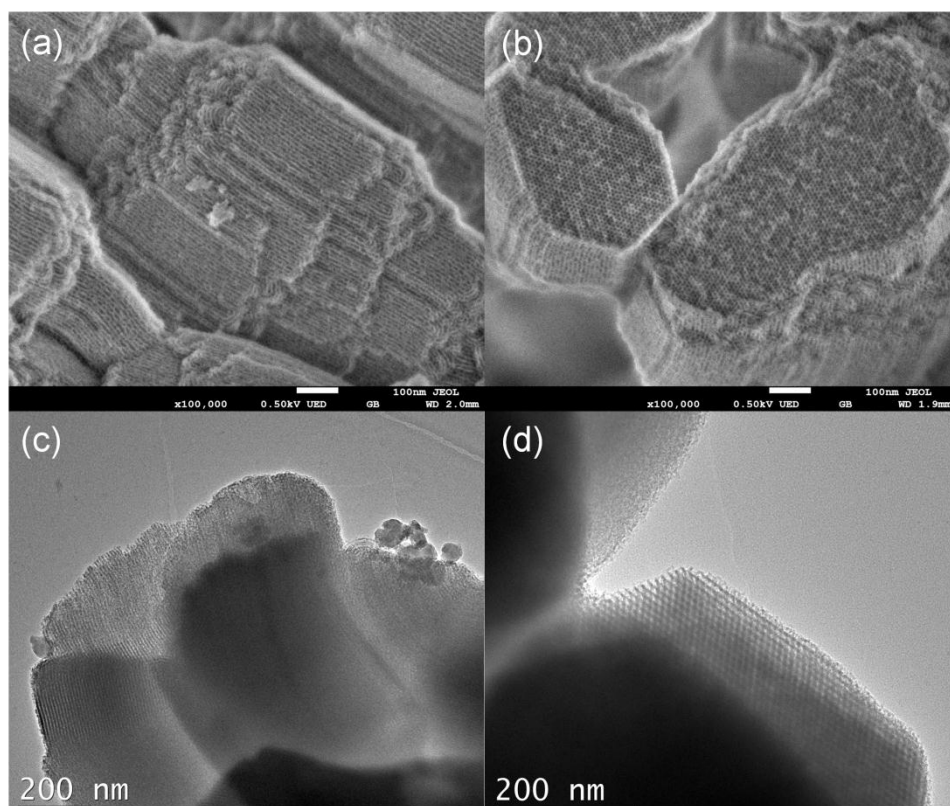

Fig. S2 (a, b) HRSEM and (c, d) TEM images of SBA-15 silica template.

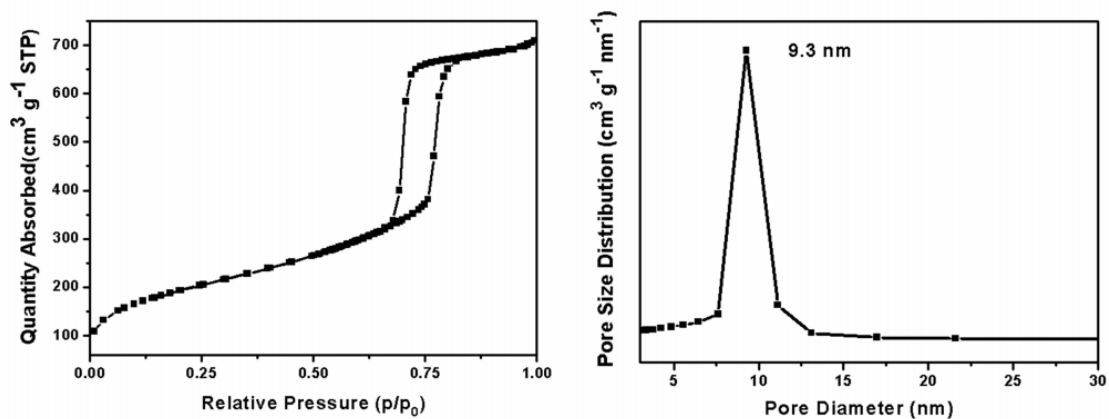

**Fig. S3** (a) Nitrogen adsorption-desorption isotherm and (b) corresponding pore size distribution for SBA-15 silica template according to BJH method.

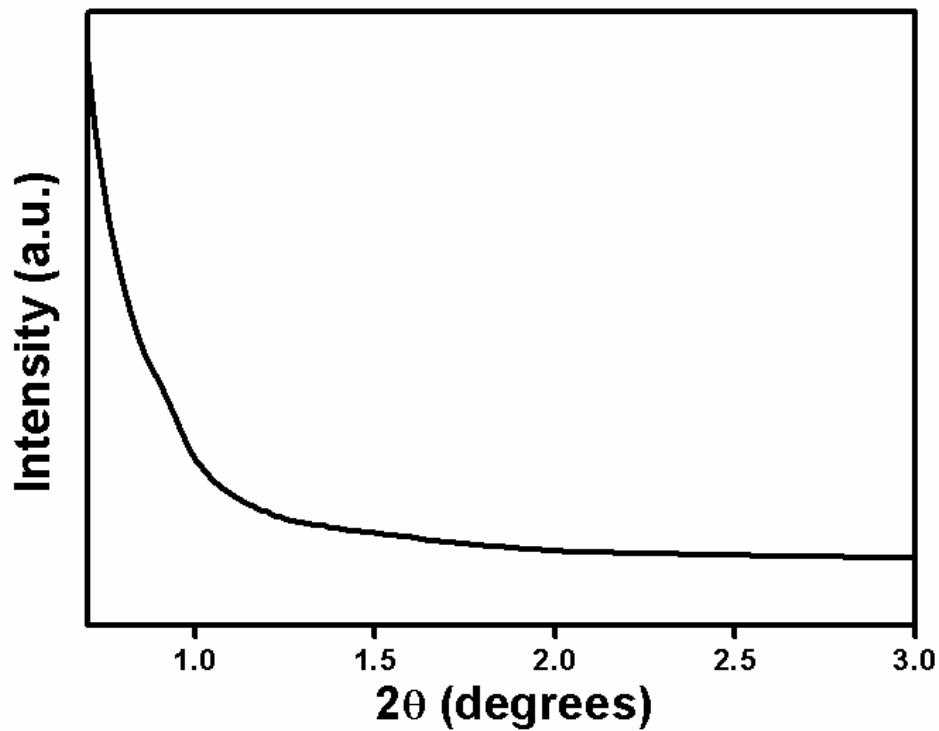

**Fig. S4**  $\text{MnO}_2$  prepared without the aid of vacuum

**Table. S1** Physical Properties of SBA-15, meso-MnO<sub>2</sub> and synergetic adsorbents.

|                       | Pore size distribution (nm) | Surface area (m <sup>2</sup> g <sup>-1</sup> ) | Pore volume (cm <sup>3</sup> g <sup>-1</sup> ) |
|-----------------------|-----------------------------|------------------------------------------------|------------------------------------------------|
| SBA-15                | 9.27                        | 689.7                                          | 1.03                                           |
| meso-MnO <sub>2</sub> | 3.11                        | 139.2                                          | 0.28                                           |
| FeMn-1                | 3.08                        | 89.8                                           | 0.24                                           |
| FeMn-2                | 3.02                        | 81.9                                           | 0.22                                           |
| FeMn-3                | 2.82                        | 75.4                                           | 0.20                                           |
| FeMn-4                | 2.72                        | 69.2                                           | 0.18                                           |

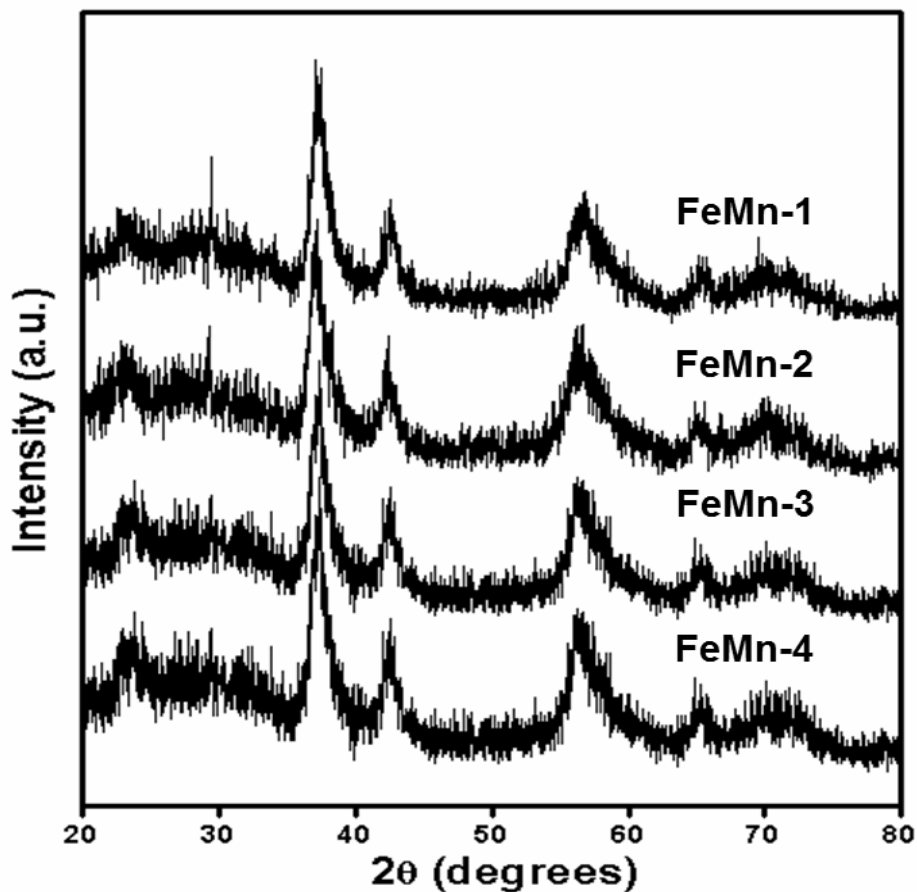

**Fig. S5** The XRD patterns of adsorbents FeMn-x series adsorbents

In order to investigate the adsorption type and describe the relationship between the adsorbent and adsorbate, the Langmuir (Eq. S1) and Freundlich (Eq. S2) were used.

$$Q_e = \frac{bQ_m C_e}{1 + bC_e} \quad (\text{S1})$$

$$Q_e = kC_e^{(1/n)} \quad (\text{S2})$$

where  $Q_e$  is the amount of arsenic adsorbed on the solid phase (mg/g),  $C_e$  the equilibrium concentration in solution phase (mg/L);  $Q_m$  (mg/g) the maximum adsorption capacity, and  $b$  (L/mg) Langmuir constants related to energy of adsorption. The  $k$  (mg/g) and  $n$  for the Freundlich constants associated with the adsorption capacity and heterogeneity factor, respectively. The constants of Langmuir and Freundlich isotherms are presented in Table S2.

**Table S2.** The isotherm parameters for As adsorption of the synergetic adsorbent FeMn-2

| Arsenic Species | Langmuir model |            |       | Freundlich model |       |       |
|-----------------|----------------|------------|-------|------------------|-------|-------|
|                 | $Q_m$ (mg/g)   | $b$ (L/mg) | $R^2$ | $k$ (mg/g)       | $n$   | $R^2$ |
| As(III)         | 10.55          | 1.895      | 0.988 | 6.092            | 5.942 | 0.974 |

Adsorption kinetic study was performed to calculate the reaction rate between the arsenic anion and adsorbent. Pseudo-first order (Eq. S3) and pseudo-second order (Eq. S4) models were applied to analyze the kinetics of arsenic adsorption as follows.

$$Q_t = Q_e(1 - e^{-k_1 t}) \quad (\text{S3})$$

$$Q_t = \frac{tk_2 Q_e^2}{1 + k_2 Q_e t} \quad (\text{S4})$$

where  $k_1$  ( $\text{min}^{-1}$ ) and  $k_2$  ( $\text{g mg}^{-1} \text{min}^{-1}$ ) are the pseudo-first order and pseudo-second order rate constants, respectively;  $Q_t$  and  $Q_e$  the amount of arsenic adsorbed at any time ( $\text{mg g}^{-1}$ ) and equilibrium adsorption capacity, and  $t$  (min) the reaction time. The kinetic parameters of pseudo-first order and pseudo-second order models estimated for the adsorption are shown in Table S3.

**Table S3.** The kinetic parameters of As adsorption of the synergetic adsorbent FeMn-2

| Arsenic Species | Pseudo-first-order model    |                              |       | Pseudo-second-order model                    |                              |       |
|-----------------|-----------------------------|------------------------------|-------|----------------------------------------------|------------------------------|-------|
|                 | $k_1$ ( $\text{min}^{-1}$ ) | $Q_e$ ( $\text{mg g}^{-1}$ ) | $R^2$ | $k_2$ ( $\text{g mg}^{-1} \text{min}^{-1}$ ) | $Q_e$ ( $\text{mg g}^{-1}$ ) | $R^2$ |
| As(III)         | 0.182                       | 0.192                        | 0.779 | 1.574                                        | 0.203                        | 0.973 |
